# Supplementary material
Source: PubMed Central journal article supplement (PMC4743983)

**Supplementary Materials:**  
**SUPPLEMENTARY TABLE 1: PICOTS FRAMEWORK**

|          | <b>Components</b>   | <b>Characteristics</b>                                                                                                                                                                                                                                                                                                                                                                                                                                                                                                                                                                                                                                                   |
|----------|---------------------|--------------------------------------------------------------------------------------------------------------------------------------------------------------------------------------------------------------------------------------------------------------------------------------------------------------------------------------------------------------------------------------------------------------------------------------------------------------------------------------------------------------------------------------------------------------------------------------------------------------------------------------------------------------------------|
| <b>P</b> | <b>Population</b>   | <p>Children aged 0-5 years.</p> <p>- Subgroup analysis:</p> <ul style="list-style-type: none"> <li>o Age: &lt; 2 years, ≥ 2 years</li> <li>o History of past wheeze/asthma</li> </ul>                                                                                                                                                                                                                                                                                                                                                                                                                                                                                    |
| <b>I</b> | <b>Intervention</b> | Vaccine or Drug intervention (type)                                                                                                                                                                                                                                                                                                                                                                                                                                                                                                                                                                                                                                      |
| <b>C</b> | <b>Control</b>      | Vaccine or Drug control (type)                                                                                                                                                                                                                                                                                                                                                                                                                                                                                                                                                                                                                                           |
| <b>O</b> | <b>Outcomes</b>     | <p><b>Wheeze or ‘Wheeze equivalents’ as adverse events</b></p> <p>1. Definition of wheeze: absent/present (statement)</p> <ul style="list-style-type: none"> <li>a. History: past wheeze/asthma</li> <li>b. Clinical exam <ul style="list-style-type: none"> <li>• Audible wheeze <b>without a stethoscope</b></li> <li>• Wheeze on auscultation</li> </ul> </li> <li>c. Response to bronchodilator/Bronchodilator use</li> <li>d. Assessors: Number and Qualifications</li> <li><b>e. Description of timing (post hoc analysis)</b></li> </ul> <p>2. Assessment of severity of wheeze: no/yes (categories and definitions)</p> <p>3. Diagnostic certainty of wheeze</p> |
| <b>T</b> | <b>Timing</b>       | Trials will be restricted to those ≥ 1970.                                                                                                                                                                                                                                                                                                                                                                                                                                                                                                                                                                                                                               |
| <b>S</b> | <b>Setting</b>      | Any vaccine or Drug clinical trial setting (inpatient, out-patient or community settings)                                                                                                                                                                                                                                                                                                                                                                                                                                                                                                                                                                                |

**SUPPLEMENTARY TABLE 2: PUBMED SEARCH STRATEGY: 28<sup>TH</sup> OCTOBER 2014**

|          | <b>Framework</b>                                                                                                                                                                                                        | <b>Search terms</b>                                                                                                                                                                                                                                                                                                 | <b>Number of articles</b>                      |
|----------|-------------------------------------------------------------------------------------------------------------------------------------------------------------------------------------------------------------------------|---------------------------------------------------------------------------------------------------------------------------------------------------------------------------------------------------------------------------------------------------------------------------------------------------------------------|------------------------------------------------|
| <b>P</b> | <b>Population</b><br>1.children<br>2.infants                                                                                                                                                                            | ( Child[mh] OR Child[tw]) OR ( Infant[mh] OR infant[tw] )                                                                                                                                                                                                                                                           | <b>P: 2133191</b>                              |
| <b>I</b> | <b>Intervention</b><br>1.clinical trials<br>2.drug<br>3.vaccine                                                                                                                                                         | AND( ( Clinical Trial[PT] OR Clinical Trials as Topic[mh])<br>AND<br>(Therapeutic use [sh] OR Therapy[sh] OR Treatment outcome [mh])<br>AND<br>(Vaccin*[tw] OR Immunization[mh]) )                                                                                                                                  | <b>I: 19701</b><br><br><b>P + I: 5348</b>      |
| <b>C</b> | <b>Control</b>                                                                                                                                                                                                          | -                                                                                                                                                                                                                                                                                                                   | -                                              |
| <b>O</b> | <b>Outcome</b><br>1.wheeze<br>2.rhonchi<br>3.bronchiolitis<br>4.bronchitis<br>5.asthma<br>6.reactive airway disease<br>7.respiratory hypersensitivity<br>8.upper respiratory infection<br>9.lower respiratory infection | AND<br>( Respiratory Sounds[mh] OR (wheeze[mh] OR wheez*[tw]) OR (rhonchi[mh] OR rhonchi[tw]) OR (bronchiolitis[mh] OR bronchiolitis[tw]) OR (bronchitis[tw] OR asthma[tw] OR reactive airway disease[tw]) OR (respiratory hypersensitivity[mh]) OR (upper respiratory infection) OR (lower respiratory infection)) | <b>O: 466415</b><br><br><b>P + I + O: 1121</b> |
| <b>T</b> | <b>Timing</b><br>1.restricting to articles between 1970 and 2014                                                                                                                                                        | AND<br><br>(1970:2014[dp])                                                                                                                                                                                                                                                                                          | <b>P+I+O+T: 1110</b>                           |
| <b>S</b> | <b>Setting</b><br>1.restricting to English language articles                                                                                                                                                            | AND<br><br>("English"[la])                                                                                                                                                                                                                                                                                          | <b>P+I+O+T+S: 1005</b>                         |

**SUPPLEMENTARY TABLE 3: ADDITIONAL DATABASES SEARCHED 28 OCTOBER 2014**

| Database                       | Search terms                                                                                                                                            | Articles |
|--------------------------------|---------------------------------------------------------------------------------------------------------------------------------------------------------|----------|
| EMBASE                         | 'infant'/exp OR infant OR 'child'/exp OR child AND ('vaccine'/exp OR vaccine) AND trial AND ('wheeze'/exp OR wheeze) AND [embase]/lim NOT [medline]/lin | 22       |
| Web of Science                 | TOPIC: ((infant OR child) AND vaccine AND trial AND wheeze)                                                                                             | 30       |
| SCOPUS                         | ((infant OR child) AND vaccine AND trial AND wheeze)                                                                                                    | 13       |
| CINAHL PLUS                    | ((infant OR child) AND vaccine AND trial AND wheeze)<br>*Expanded search by including related words and searching within full text of the articles      | 66       |
| Cochrane Library               | (infant OR child) AND vaccine AND trial AND wheeze)                                                                                                     | 1        |
| WHO Library Databases (WHOLIS) | (vaccine AND trial AND wheeze)<br>Option: VACCINES+ADVERSE+EFFECTS                                                                                      | 60       |
| ClinicalTrials.gov             | child AND vaccine AND trial AND wheeze                                                                                                                  | 8        |

**SUPPLEMENTARY TABLE 4: REPORTING DEFINITIONS OF WHEEZE AS AN ADVERSE EVENT**

| Supplementary Table 4a: Clinical trials of children <5 years reporting definitions of wheeze as an adverse event |                                                                               |                                                                                                                                                                                                                                            |                                        |                                                                                                                                                                                                                                                                                                                     |                                                                                                                                                                                                                                                                                     |                            |
|------------------------------------------------------------------------------------------------------------------|-------------------------------------------------------------------------------|--------------------------------------------------------------------------------------------------------------------------------------------------------------------------------------------------------------------------------------------|----------------------------------------|---------------------------------------------------------------------------------------------------------------------------------------------------------------------------------------------------------------------------------------------------------------------------------------------------------------------|-------------------------------------------------------------------------------------------------------------------------------------------------------------------------------------------------------------------------------------------------------------------------------------|----------------------------|
| Author                                                                                                           | Country(s)                                                                    | Participants                                                                                                                                                                                                                               | Included children w/ history of wheeze | Intervention & Control                                                                                                                                                                                                                                                                                              | Wheeze Description                                                                                                                                                                                                                                                                  | Wheeze Severity Definition |
| <b>Studies including children age &lt;2 years</b>                                                                |                                                                               |                                                                                                                                                                                                                                            |                                        |                                                                                                                                                                                                                                                                                                                     |                                                                                                                                                                                                                                                                                     |                            |
| <b>Belshe, 2007</b> [38]                                                                                         | United States 12 countries in Europe and the Middle East, 3 countries in Asia | Children: 6-59 months without a recent episode of wheezing (>42 days) illness or severe asthma (N=8,352).                                                                                                                                  | Yes                                    | <i>Intervention:</i> Cold-adapted trivalent live attenuated influenza vaccine<br><br><i>Control:</i> Trivalent inactivated influenza vaccine                                                                                                                                                                        | Medically significant wheeze -defined as presence of wheezing on a physical examination conducted by a health care provider, with a prescription for a daily bronchodilator, respiratory distress, or hypoxemia. <b>Wheezing within 42 days after the administration of dose 1.</b> | No definition provided     |
| <b>Custovic, 2002</b> [33]                                                                                       | UK                                                                            | High-risk infants (both parents atopic, i.e. skin-prick test positive; no pets) (N=291 couples randomized)<br><br>'Medium risk' infants (one parent skin-prick test positive; family history of atopy)<br><br>ages of 6 months and 5 years | No                                     | <i>High Risk Intervention:</i> House dust mite-allergen avoidance [high-risk active group (HRA)]<br><br><i>High Risk Control:</i> No intervention<br><br><i>Medium Risk Intervention:</i> Fluticasone propionate delivered by a metered-dose inhaler(MDI) spacer (Babyhaler including facemask; 100 mg twice daily) | Physician-verified wheeze.<br><br>Also used whole-body plethysmography in children for measurement of specific airway resistance.                                                                                                                                                   | No definition provided     |

|                                     |                 |                                                                                                                                 |     |                                                                                                                                                           |                                                                                                                                                                                                                                                                                                                                                                                                                                                                                                                        |                                                                              |
|-------------------------------------|-----------------|---------------------------------------------------------------------------------------------------------------------------------|-----|-----------------------------------------------------------------------------------------------------------------------------------------------------------|------------------------------------------------------------------------------------------------------------------------------------------------------------------------------------------------------------------------------------------------------------------------------------------------------------------------------------------------------------------------------------------------------------------------------------------------------------------------------------------------------------------------|------------------------------------------------------------------------------|
| (N=547)                             |                 |                                                                                                                                 |     |                                                                                                                                                           |                                                                                                                                                                                                                                                                                                                                                                                                                                                                                                                        |                                                                              |
| <i>Medium Risk Control: Placebo</i> |                 |                                                                                                                                 |     |                                                                                                                                                           |                                                                                                                                                                                                                                                                                                                                                                                                                                                                                                                        |                                                                              |
| <b>Rose, 2010</b><br>[37]           | Germany         | Children age 6-24 months recruited from a walk-in clinic with a history of wheezing needing bronchodilators or steroids (N=131) | Yes | <i>Intervention:</i> dietary supplementation with <i>Lactobacillus rhamnosus</i><br><br><i>Control:</i> Placebo supplementation                           | All patients had wheeze; definition: " at least 2 physician-diagnosed episodes of wheezing (>= 3 days necessitating B2-bronchodilators or steroids) during past 12 months with one episode within past 3 months."<br><br>Self report through diary by parents of episodes of asthmatic exacerbations including wheeze and cough, numbers and days of associated hospitalizations, symptom-free days, days without use of rescue medication, and associated inhaled steroid and B-agonist use).<br>Asthma symptom score | Severe asthma was defined as at least five episodes of wheezing annually     |
| <b>Belshe, 1992</b><br>[1]          | United States   | Children: 3-36 months; and 3-10 years (N=95)                                                                                    | No  | <i>Intervention:</i> Cold passage 18 para-influenza type 3 vaccine (CP18 PIV-3) vaccine diluted in Leibovitz medium (L-15)<br><br><i>Control:</i> Placebo | Clinical definition of illness: lower respiratory illness, wheezing or pneumonia                                                                                                                                                                                                                                                                                                                                                                                                                                       | "Intermittent" "Mild", and "wheeze did not require bronchodilator treatment" |
| <b>Corver, 2006</b> [39]            | The Netherlands | Pregnant women enrolled and their children were followed (N=810)                                                                | No  | <i>Intervention:</i> Polyester-cotton mite allergen impermeable mattress & pillow covers (Acb; Allergy Control Products, Saratoga Springs, NY) for the    | Wheeze assessed using questionnaire during first four years of life                                                                                                                                                                                                                                                                                                                                                                                                                                                    | No definition provided                                                       |

|                            |               |                                                                                             |     |                                                                                                                              |                                                                                                                                                                                                                                                                    |                                                                                                             |
|----------------------------|---------------|---------------------------------------------------------------------------------------------|-----|------------------------------------------------------------------------------------------------------------------------------|--------------------------------------------------------------------------------------------------------------------------------------------------------------------------------------------------------------------------------------------------------------------|-------------------------------------------------------------------------------------------------------------|
|                            |               |                                                                                             |     | parental and child<br>beds<br><br><i>Control:</i> Cotton placebo covers                                                      |                                                                                                                                                                                                                                                                    |                                                                                                             |
| <b>Douglas, 1984</b> [40]  | Australia     | Children age 6-54 months of age identified at general practitioners offices (N=1273)        | Yes | <i>Intervention:</i> 14-valent <i>Streptococcus pneumoniae</i> polysaccharide vaccine<br><br><i>Control:</i> Placebo vaccine | Mothers recorded symptoms in dairies including “cough, deep chest cough, wheezing and breathlessness” and how symptoms restricted activity, medications required and medical or hospital care.                                                                     | Recorded whether wheeze required hospitalization, medication or restricted activity                         |
| <b>Esposito, 2003</b> [36] | Italy         | Children age six months-14 years attending the infectious disease ambulatory clinic (N=127) | No  | <i>Intervention:</i> Influenza vaccine<br><br><i>Control:</i> Placebo vaccine                                                | Children excluded for wheeze defined as “at least four acute episodes of wheezing in past 12 months”<br><br>Parents reported symptoms on dairy cards, and active surveillance requested information about respiratory illness. Wheeze included as a symptom of LRI | No definition provided                                                                                      |
| <b>Jahani, 2012</b> [41]   | Iran          | Asthmatic children in daycare age 6-60 months (N=140)                                       | Yes | <i>Intervention:</i> Inactivated trivalent influenza vaccine<br><br><i>Control:</i> Placebo vaccine                          | Used symptom score cards to record wheeze, cough and other respiratory symptoms (full text unavailable)                                                                                                                                                            | No definition provided                                                                                      |
| <b>Gaglani, 2008</b> [4]   | United States | Healthy children aged 1.5–18 years with history of intermittent wheezing                    | No  | <i>Intervention:</i> Single 0.5 mL dose of LAIV in frozen, single-dose, intranasal applicators each year (for 4 years),      | ICD-9 code for Asthma or Reactive Airway Disease and parental report of wheeze                                                                                                                                                                                     | Defined intermittent wheezing as those with a history asthma or reactive airway disease or wheezing who did |

|                             |               |                                                                  |    |                                                                                                                                                                    |                                                                                                                                                                                                                       |                                                                                                                                                                                                                         |
|-----------------------------|---------------|------------------------------------------------------------------|----|--------------------------------------------------------------------------------------------------------------------------------------------------------------------|-----------------------------------------------------------------------------------------------------------------------------------------------------------------------------------------------------------------------|-------------------------------------------------------------------------------------------------------------------------------------------------------------------------------------------------------------------------|
|                             |               | (N=18,780 doses of vaccine over 4 years)                         |    | <i>Control:</i> Compared rates during pre-vaccine time period (cross-over design)                                                                                  |                                                                                                                                                                                                                       | not use steroids or bronchodilator therapy daily or every other day for asthma control.<br><br>Not hospitalized or seen in the emergency room for asthma in the past 12 months (past 6 months if less than 2 years old) |
| <b>Greenhawt, 2012</b> [34] | United States | Healthy children with an egg allergy (mean age 12 months) (N=31) | No | <i>Intervention:</i> TIV vaccine split does<br><br><i>Control:</i> Full dose                                                                                       | Clinicians observed patients for 30 minutes for symptoms of allergy including wheeze                                                                                                                                  | No definition provided                                                                                                                                                                                                  |
| <b>Piedra, 1990</b> [42]    | USA           | Premature newborns (N=92)                                        | No | <i>Intervention 1:</i> 10ml/kg Immunoglobulin (Baxter)<br><br><i>Intervention 2:</i> 10ml/kg Albumin Saline                                                        | Wheeze: “musical sound on expiration”<br><br>Rhonchi on auscultation<br><br>Both assessed by a doctor.                                                                                                                | None provided, however comment on the level of respiratory support e.g. FiO <sub>2</sub> , PEEP, PIP, MAP, CPAP, and demand ventilation.                                                                                |
| <b>Piedra, 1993</b> [43]    | USA           | Healthy infants 6-32 months (N=52)                               | No | 1985-1986 cross-over study: (n=10 infants, 5-32 months)<br><br><i>Intervention:</i> Cold recombinant influenza type A (CRA) vaccine<br><br><i>Control:</i> Placebo | Parental history of wheeze or rhonchi solicited.<br><br>Clinical exam included assessing for breathing with musical sound, wheeze, or rhonchi heard on auscultation of the chest for acute respiratory disease (ARD). | None provided.                                                                                                                                                                                                          |

1987-1988 study:  
(n=16 infants, 9-13 months)

Bronchiolitis was defined as labored breathing with wheeze.

1988-1989 study:  
(n=29 infants, 6-13 months)

*Intervention 1:* intranasal CRA

*Intervention 2:* intramuscular Trivalent inactivated influenza (TI) vaccine

*Control:* Placebo (sterile saline – half intranasal, half intramuscular)

### Studies of children $\geq 2$ years

|                         |            |                       |     |                                                                                                                                                                                             |                                                                                                                                                                                                                                                        |                                                                                                                                                                                                                        |
|-------------------------|------------|-----------------------|-----|---------------------------------------------------------------------------------------------------------------------------------------------------------------------------------------------|--------------------------------------------------------------------------------------------------------------------------------------------------------------------------------------------------------------------------------------------------------|------------------------------------------------------------------------------------------------------------------------------------------------------------------------------------------------------------------------|
| <b>Ortiz, 2015 [11]</b> | Bangladesh | Children 24-59 months | Yes | <i>Intervention:</i> SII LAIV is a live, trivalent seasonal influenza vaccine.<br><br><i>Control:</i> Inactive placebo identical to SII LAIV in appearance, ingredients, and concentrations | Long high-pitched whistling or musical sound on expiration heard by auscultation over the lung fields. Wheeze can occur in the presence or absence of pneumonia or other medical diagnoses.<br><br>AMONG CHILDREN MEETING CERTAIN EVALUATION CRITERIA. | Protocol-defined wheezing illness (PDWI) will be graded as follows:<br>1. Mild: wheezing illness as above without other findings associated with moderate, severe, or life threatening severity.<br>2. Moderate: Nasal |
|-------------------------|------------|-----------------------|-----|---------------------------------------------------------------------------------------------------------------------------------------------------------------------------------------------|--------------------------------------------------------------------------------------------------------------------------------------------------------------------------------------------------------------------------------------------------------|------------------------------------------------------------------------------------------------------------------------------------------------------------------------------------------------------------------------|



|                                |            |                       |     |                                                                                                                                                                                                                                                      |                                                                                                                                                                                                                                                               |                                                                                                                                                                                                                                                                                                                                                                                                                                                                                                              |
|--------------------------------|------------|-----------------------|-----|------------------------------------------------------------------------------------------------------------------------------------------------------------------------------------------------------------------------------------------------------|---------------------------------------------------------------------------------------------------------------------------------------------------------------------------------------------------------------------------------------------------------------|--------------------------------------------------------------------------------------------------------------------------------------------------------------------------------------------------------------------------------------------------------------------------------------------------------------------------------------------------------------------------------------------------------------------------------------------------------------------------------------------------------------|
|                                |            |                       |     |                                                                                                                                                                                                                                                      |                                                                                                                                                                                                                                                               | flaring OR chest indrawing OR Pulse oximetry 90 – 95%.<br>3. Severe: Dyspnea at rest causing inability to perform usual social & functional activities OR Pulse oximetry < 90%.<br>4. Life threatening.                                                                                                                                                                                                                                                                                                      |
| <b>Brooks, Zaman, PATH [9]</b> | Bangladesh | Children 24-59 months | Yes | <p><i>Intervention:</i> SII LAIV is a live, trivalent seasonal influenza vaccine.</p> <p><i>Control:</i> Inactive placebo identical to SII LAIV in appearance, ingredients, and concentrations, except it is missing attenuated influenza virus.</p> | <p>Long high-pitched whistling or musical sound on expiration heard by auscultation over the lung fields. Wheeze can occur in the presence or absence of pneumonia or other medical diagnoses.</p> <p>AMONG CHILDREN MEETING CERTAIN EVALUATION CRITERIA.</p> | <p>Protocol-defined wheezing illness (PDWI) will be graded as follows:</p> <ol style="list-style-type: none"> <li>1. Mild: wheezing illness as above without other findings associated with moderate, severe, or life threatening severity.</li> <li>2. Moderate: Nasal flaring OR chest indrawing OR Pulse oximetry 90 – 95%.</li> <li>3. Severe: Dyspnea at rest causing inability to perform usual social &amp; functional activities OR Pulse oximetry &lt; 90%.</li> <li>4. Life threatening</li> </ol> |

|                                 |         |                       |     |                                                                                                                                                                                                    |                                                                                                                                                                                                                                                                                                                                                                   |                                                                                                                                                                                                                                                                                                                                                                                                                                                                                                              |
|---------------------------------|---------|-----------------------|-----|----------------------------------------------------------------------------------------------------------------------------------------------------------------------------------------------------|-------------------------------------------------------------------------------------------------------------------------------------------------------------------------------------------------------------------------------------------------------------------------------------------------------------------------------------------------------------------|--------------------------------------------------------------------------------------------------------------------------------------------------------------------------------------------------------------------------------------------------------------------------------------------------------------------------------------------------------------------------------------------------------------------------------------------------------------------------------------------------------------|
| <b>Diallo, Niang, PATH [10]</b> | Senegal | Children 24-71 months | Yes | <p><i>Intervention:</i> SII LAIV is a live, trivalent seasonal influenza vaccine.</p> <p><i>Control:</i> Inactive placebo identical to SII LAIV in appearance, ingredients, and concentrations</p> | <p>Upon physical examination is found to have a wheeze, defined as —long high-pitched whistling or musical sound on expiration heard by auscultation over the lung fields.</p> <p>Wheeze can occur in the presence or absence of pneumonia or other medical diagnoses.</p> <p style="text-align: center;">AMONG CHILDREN MEETING CERTAIN EVALUATION CRITERIA.</p> | <p>Protocol-defined wheezing illness (PDWI) will be graded as follows:</p> <ol style="list-style-type: none"> <li>1. Mild: wheezing illness as above without other findings associated with moderate, severe, or life threatening severity.</li> <li>2. Moderate: Nasal flaring OR chest indrawing OR Pulse oximetry 90 – 95%.</li> <li>3. Severe: Dyspnea at rest causing inability to perform usual social &amp; functional activities OR Pulse oximetry &lt; 90%.</li> <li>4. Life threatening</li> </ol> |
|---------------------------------|---------|-----------------------|-----|----------------------------------------------------------------------------------------------------------------------------------------------------------------------------------------------------|-------------------------------------------------------------------------------------------------------------------------------------------------------------------------------------------------------------------------------------------------------------------------------------------------------------------------------------------------------------------|--------------------------------------------------------------------------------------------------------------------------------------------------------------------------------------------------------------------------------------------------------------------------------------------------------------------------------------------------------------------------------------------------------------------------------------------------------------------------------------------------------------|

Supplementary Table 4b: Clinical trials of children <5 years reporting wheeze as a part of a definition for respiratory illness or non-specific wheeze definition

| Author                                            | Country(s)                                                                                                  | Participants                                                            | Included children w/ history of wheeze | Intervention & Control                                                                                                                                             | Wheeze Description                                                                                                                                                                                                                        | Wheeze Severity Definition |
|---------------------------------------------------|-------------------------------------------------------------------------------------------------------------|-------------------------------------------------------------------------|----------------------------------------|--------------------------------------------------------------------------------------------------------------------------------------------------------------------|-------------------------------------------------------------------------------------------------------------------------------------------------------------------------------------------------------------------------------------------|----------------------------|
| <b>Studies including children age &lt;2 years</b> |                                                                                                             |                                                                         |                                        |                                                                                                                                                                    |                                                                                                                                                                                                                                           |                            |
| <b>Anderson, 1992 [14]</b>                        | United States                                                                                               | Children eight months to 14 years whose parents volunteered them (N=89) | No                                     | <i>Intervention:</i> Cold adapted influenza B vaccine<br><br><i>Control:</i> No vaccine                                                                            | Daily home surveillance of respiratory virus. Wheeze included as symptom detected by surveillance                                                                                                                                         | No definition provided     |
| <b>Ashkenazi, 2006 [21]</b>                       | Belgium, Czech Republic, Finland, Germany, Italy, Poland, Spain, Switzerland, the United Kingdom and Israel | Children: 0.5-5.9 years (N=2187)                                        | No                                     | <i>Intervention:</i> 2 doses of cold-adapted influenza vaccine, trivalent (CAIV-T)<br><br><i>Control:</i> 2 doses of trivalent inactivated influenza vaccine (TIV) | a. Diary card by parents/guardians.<br>b. Episodes of wheeze associated with influenza-like illness during the surveillance phase were reported on the case report form.<br>c. Practitioner-reported wheeze during the surveillance phase | No definition provided     |
| <b>Belshe, 1998 [44]</b>                          | United States                                                                                               | Healthy children age 15-71 months (N=203)                               | No                                     | <i>Intervention:</i> Cold-adapted, trivalent influenza (CAIV-T) virus vaccine<br><br><i>Control:</i> Placebo vaccine                                               | Wheezing and shortness of breath were included as a symptom of influenza and identified by parents.                                                                                                                                       | No definition provided     |
| <b>Bergen, 2004 [2]</b>                           | United States                                                                                               | Health children age 1-17 years in Kaiser Permanente (N=9686)            | No                                     | <i>Intervention:</i> CAIV vaccine                                                                                                                                  | Wheeze, asthma and other respiratory SAEs were identified through linking to databases that tracked hospitalizations, emergency, and clinic visits. Physicians                                                                            | No definition provided     |

|                            |               |                                                                                                                                            |    |                                                                                                                                                                      |                                                                                                                   |                                                                   |
|----------------------------|---------------|--------------------------------------------------------------------------------------------------------------------------------------------|----|----------------------------------------------------------------------------------------------------------------------------------------------------------------------|-------------------------------------------------------------------------------------------------------------------|-------------------------------------------------------------------|
|                            |               |                                                                                                                                            |    | <i>Control:</i> Placebo vaccine                                                                                                                                      | and parents were contacted for follow-up on SAEs.                                                                 |                                                                   |
| <b>Clements, 1996</b> [45] | United States | Healthy children age 2-36 months recruited from the community (N=78)                                                                       | No | <i>Intervention:</i> Influenza vaccine<br><br><i>Control:</i> Placebo vaccine                                                                                        | Wheeze included in the definition of LRI                                                                          | No definition provided                                            |
| <b>Englund, 2013</b> [46]  | United States | HPIV3 Negative children in good health age 6-36 months (N=70)                                                                              | No | <i>Intervention:</i> 2 doses of the live-attenuated recombinant cold-passage para-influenza type 3 vaccine (CP PIV-3)<br><br><i>Control:</i> 2 doses placebo vaccine | LRI were defined as “confirmed wheezing, rales, pneumonia, croup, or rhonchi, or radiologic evidence of pneumonia | All LRIs were defined as serious adverse events including wheeze. |
| <b>Esposito, 2007</b> [47] | Italy         | Healthy infant children presenting at vaccination centers (mean age 82 days) (N=1555)                                                      | No | <i>Intervention:</i> <i>PVC-7 vaccine</i><br><br><i>Control:</i> No vaccine                                                                                          | Parents recorded symptoms in dairies. Wheeze included in the definition of LRI                                    | No definition given                                               |
| <b>Esposito, 2010</b> [48] | Italy         | Children age 2 and older who had completed cancer therapy for acute lymphoblastic leukemia, Hodgkin disease or no-Hodgkin lymphoma (N=273) | No | <i>Intervention:</i> inactivated trivalent, virosome-formulated subunit influenza vaccine.<br><br><i>Control:</i> No vaccine                                         | Parents recorded symptoms including wheeze. Wheeze included as a symptom of respiratory illness and LRI.          | No definition given                                               |

|                          |                                                                                                                                                             |                                                                                                |     |                                                                                                                                                                                                                                           |                                                                                                                                                                                                                                                                                 |                        |
|--------------------------|-------------------------------------------------------------------------------------------------------------------------------------------------------------|------------------------------------------------------------------------------------------------|-----|-------------------------------------------------------------------------------------------------------------------------------------------------------------------------------------------------------------------------------------------|---------------------------------------------------------------------------------------------------------------------------------------------------------------------------------------------------------------------------------------------------------------------------------|------------------------|
| <b>Jansen, 2009</b> [49] | Netherlands                                                                                                                                                 | Children age 18-36 months with a previous physician diagnosed respiratory infection (N=597)    | Yes | <p><i>Intervention 1:</i> TIV+ PCV-7 vaccine</p> <p><i>Intervention 2:</i> TIV+ placebo vaccine</p> <p><i>Control:</i> HBV + placebo vaccine</p>                                                                                          | <p>Excluded children with chronic asthma or recurrent wheeze (longer than three months)</p> <p>Parents recorded symptoms of respiratory infection including wheeze. If symptoms require a visit to the physician, then doctors completed a form on diagnosis and medication</p> | No definition provided |
| <b>Kiraly, 2013</b> [35] | Guinea-Bissau                                                                                                                                               | <p>Low birth weight neonates (n=808 in the BCG study</p> <p>(n=702 in the Vitamin A study)</p> | No  | <p><i>Intervention:</i> Early BCG vaccination;</p> <p>Vitamin A supplementation</p> <p><i>Control:</i> Delayed BCG vaccination (as usual)</p> <p>No Vitamin A supplementation</p>                                                         | Asthma symptoms assessed using questions from the ISAAC questionnaire. Reported ever wheeze, wheeze in past 12 months, exercise induced wheeze, dry cough after exercise, nocturnal cough                                                                                       | No definition provided |
| <b>Lum, 2010</b> [50]    | 13 countries (Bangladesh, Belgium, Finland, Germany, Hong Kong, Lithuania, Malaysia, Mexico, the Philippines, Poland, Singapore, South Korea, and Thailand) | Children 11-24 months (N=1233)                                                                 | No  | <p><i>Intervention:</i> Trivalent live attenuated influenza virus vaccine - LAIV (MedImmune) + Priorix® (GlaxoSmithKline, Rixensart, Belgium)</p> <p><i>Control:</i> Placebo vaccine + Priorix® (GlaxoSmithKline, Rixensart, Belgium)</p> | Mention of wheeze (as a symptom identified through influenza surveillance); bronchospasm and bronchitis (reported as one of the most common SAEs); no mention of asthma/allergy                                                                                                 | No definition provided |

|                         |              |                                                               |    |                                                                   |                                                                                                                                                                                                                                                              |                                                                                                                                                                                                                                                                                                                                                                                                                                                                                                                                                                                                                     |
|-------------------------|--------------|---------------------------------------------------------------|----|-------------------------------------------------------------------|--------------------------------------------------------------------------------------------------------------------------------------------------------------------------------------------------------------------------------------------------------------|---------------------------------------------------------------------------------------------------------------------------------------------------------------------------------------------------------------------------------------------------------------------------------------------------------------------------------------------------------------------------------------------------------------------------------------------------------------------------------------------------------------------------------------------------------------------------------------------------------------------|
| <b>Madhi, 2005</b> [51] | South Africa | Children vaccinated at 6, 10, and 14 weeks of age (N=39,836). | No | <i>Intervention:</i> 9-valent PCV (Wyeth Vaccines and Pediatrics) | Wheeze part of acute bronchiolitis definition. “Presence of wheezing on chest auscultation performed by one of the study doctors in the absence of documented alveolar consolidation on chest radiography or bronchial breathing on chest wall auscultation“ | WHO-definitions of pneumonia severity: Mild pneumonia was defined as cough of <14 days duration in a child with tachypnea (defined as >50 breaths/min in children <12 months of age and >140 breaths/min in children >12 months of age) in the absence of lower chest wall in-drawing or other signs and symptoms of WHO-defined severe pneumonia. WHO-defined severe pneumonia was defined as a cough of <14 days duration in a child with lower chest wall in-drawing and/or any of the following signs and symptoms of severe pneumonia: feeding difficulties, convulsions, central cyanosis, or encephalopathy. |
|                         |              |                                                               |    | <i>Control:</i> Placebo                                           | Classification of mild/severe pneumonia without wheezing.                                                                                                                                                                                                    |                                                                                                                                                                                                                                                                                                                                                                                                                                                                                                                                                                                                                     |

|                          |           |                                                                              |    |                                                                                                                                                                                                                                                    |                                                                                                                                                                                                                                                                                                                                                                         |                                                                                                                                                                              |
|--------------------------|-----------|------------------------------------------------------------------------------|----|----------------------------------------------------------------------------------------------------------------------------------------------------------------------------------------------------------------------------------------------------|-------------------------------------------------------------------------------------------------------------------------------------------------------------------------------------------------------------------------------------------------------------------------------------------------------------------------------------------------------------------------|------------------------------------------------------------------------------------------------------------------------------------------------------------------------------|
| <b>Malkin, 2013</b> [52] | America   | Healthy, RSV sero-negative children 5-24 months of age (N=113)               | No | <p><i>Intervention:</i> MEDI-559 (developed under a Cooperative Research and Development Agreement by MedImmune, and the National Institute of Allergy and Infectious Diseases (National Institutes of Health).</p> <p><i>Control:</i> Placebo</p> | <p>A medically attended lower respiratory illnesses (MA-LRIs) was defined as a clinical diagnosis made by a healthcare provider which included <math>\geq 1</math> of the following: wheezing, bronchiolitis, bronchitis, croup, pneumonia, rales, rhonchi, and apnea.</p> <p>Assessed by the site investigator for severity and relationship to study vaccination.</p> | <p>Adverse events were classified as: Mild, Moderate and Severe. No further definitions although hospitalization/ resulting to death was considered severe.</p>              |
| <b>Mallol, 2010</b> [53] | America   | Healthy, RSV sero-negative children 5-24 months of age (N=113)               | No | <p><i>Intervention:</i> MEDI-559 developed under a Cooperative Research and Development Agreement by MedImmune, and the National Institute of Allergy and Infectious Diseases (National Institutes of Health).</p> <p><i>Control:</i> Placebo</p>  | <p>A medically attended lower respiratory illnesses (MA-LRIs) was defined as a clinical diagnosis made by a healthcare provider which included <math>\geq 1</math> of the following: wheezing, bronchiolitis, bronchitis, croup, pneumonia, rales, rhonchi, and apnea.</p> <p>Assessed by the site investigator for severity and relationship to study vaccination.</p> | <p>Adverse events were classified as: Mild, Moderate and Severe. No further definitions although hospitalization/ resulting to death was considered severe.</p>              |
| <b>Nolan, 2008</b> [54]  | Australia | Healthy infants $\geq 6$ months to $<9$ yr born between 36-42 weeks (N=150). | No | <p><i>Intervention 1:</i> 30g H5N1 vaccine with aluminum phosphate (AlPO<sub>4</sub>) adjuvant</p> <p><i>Intervention 2:</i> 45g H5N1 vaccine with aluminum phosphate (AlPO<sub>4</sub>)</p>                                                       | <p>Wheeze was a solicited systematic AE.</p>                                                                                                                                                                                                                                                                                                                            | <p>AE graded in intensity from 0 to 4, where 0 was “absent/none” and an intensity of 4 represented an event that was “disabling” or had “life threatening consequences”.</p> |

adjuvant

|                            |           |                                                                              |    |                                                                                                                                                                                                                                                                                                                                      |                                       |                                                                                                                                                                       |
|----------------------------|-----------|------------------------------------------------------------------------------|----|--------------------------------------------------------------------------------------------------------------------------------------------------------------------------------------------------------------------------------------------------------------------------------------------------------------------------------------|---------------------------------------|-----------------------------------------------------------------------------------------------------------------------------------------------------------------------|
| <b>Nolan, 2008</b><br>[54] | Australia | Healthy infants $\geq 6$ months to $<9$ yr born between 36-42 weeks (N=150). | No | <i>Intervention 1:</i> 0.25ml Thimerosal-free inactivated influenza vaccine (Fluvax; CSL Limited, Parkville, Australia)<br><br>Given to Group A<br><br><i>Intervention 2:</i> 0.5ml Fluvax<br><br>Given to Group B.                                                                                                                  | Wheeze was a solicited systematic AE. | No classification provided                                                                                                                                            |
| <b>Nolan, 2009</b><br>[55] | Australia | Healthy infants $\geq 6$ months to $<9$ yr (N=298)                           | No | <i>Intervention 1:</i> 15 microg hemagglutinin antigen dose of monovalent unadjuvanted 2009 influenza A (H1N1) in a 2 dose regimen administered 21 days apart.<br><br><i>Intervention 2:</i> 30 microg hemagglutinin antigen dose of monovalent unadjuvanted 2009 influenza A (H1N1) in a 2 dose regimen administered 21 days apart. | Wheeze was a solicited systematic AE. | AE graded in intensity from 0 to 4, where 0 was “absent/none” and an intensity of 4 represented an event that was “disabling” or had “life threatening consequences”. |



|                             |                 |                                                                                                       |    |                                                                                                                                                                                                                                                                                                                                                                                                                                 |                                                                                                                                                                                                                                                                                                                                                                                                                                                                                                                                              |                                                     |
|-----------------------------|-----------------|-------------------------------------------------------------------------------------------------------|----|---------------------------------------------------------------------------------------------------------------------------------------------------------------------------------------------------------------------------------------------------------------------------------------------------------------------------------------------------------------------------------------------------------------------------------|----------------------------------------------------------------------------------------------------------------------------------------------------------------------------------------------------------------------------------------------------------------------------------------------------------------------------------------------------------------------------------------------------------------------------------------------------------------------------------------------------------------------------------------------|-----------------------------------------------------|
| <b>Piedra, 1996</b> [31]    | USA             | Children with cystic fibrosis aged 12 months to 8 years (N=34)                                        | No | <i>Intervention:</i> Respiratory syncytial virus, purified fusion protein (PPF-2) vaccine.<br><br><i>Control:</i> Saline placebo                                                                                                                                                                                                                                                                                                | The study nurse assessed for wheeze on auscultation of the lungs at home visits following a telephone interview that identified an acute respiratory illness.                                                                                                                                                                                                                                                                                                                                                                                | None provided.                                      |
| <b>Piedra, 2002</b> [56]    | USA             | Healthy children 15-71 months (1602)                                                                  | No | <i>Intervention:</i> trivalent, cold-adapted influenza vaccine (CAIV-T)<br><br><i>Control:</i> Placebo                                                                                                                                                                                                                                                                                                                          | Parental report on wheeze.<br><br>Physician diagnosed lower respiratory tract illness which includes wheeze. Asthma also mentioned as an SAE.                                                                                                                                                                                                                                                                                                                                                                                                | None provided.                                      |
| <b>Schonbeck, 2005</b> [57] | The Netherlands | Healthy children 18-72 months with General Physician (GP)-diagnosed respiratory tract illness (N=230) | No | <i>Intervention 1:</i> Trivalent inactivated influenza vaccine (Influvac®, Solvay) twice in the first year and once in the second year combined with the heptavalent pneumococcal conjugate vaccine (Prevnar, Wyeth; containing serotypes 4, 6B, 9V, 14, 18C, 19F and 23F);<br><br><i>Intervention 2:</i> Influenza vaccine and placebo (0.9% NaCl phosphate buffered, Solvay);<br><br><i>Control:</i> Hepatitis B vaccinations | Acute Bronchiolitis defined as in children and adults: cough and fever with scattered or generalized abnormal chest signs: wheeze, coarse rales, rhonchi or moist sounds; in infants (bronchiolitis): dyspnea and hyperinflation<br><br>Febrile RTI defined as fever for at least 2 consecutive days accompanied with at least one or more symptoms or signs including wheezing of a score of 2 or 3 on a severity scale ranging from 1 (mild) to 3 (severe).<br><br>Parental report on wheeze.<br><br>Physician diagnosed lower respiratory | Severity scale ranging from 1 (mild) to 3 (severe). |

(Engerix-B junior®, GSK)

tract illness which includes wheeze.

|                                                      |                |                                                               |    |                                                                                                                                                                                                                                                                 |                                                                                                                                                                                                                                                                                                                  |                        |
|------------------------------------------------------|----------------|---------------------------------------------------------------|----|-----------------------------------------------------------------------------------------------------------------------------------------------------------------------------------------------------------------------------------------------------------------|------------------------------------------------------------------------------------------------------------------------------------------------------------------------------------------------------------------------------------------------------------------------------------------------------------------|------------------------|
| <b>Steinhoff, 1990</b> [58]                          | USA            | Healthy children 6-48 months (N=107)                          | No | <i>Intervention 1:</i> ah vaccine [A/Mallard/NewYork/6750/78x influenza/Bethesda/1/85(H3N2) reassortant virus]<br><br><i>Intervention 2:</i> ca vaccine [influenzaA /Ann Arbor/6/60 x A/Bethesda/ 1/85 (H3N2) reassortant virus]<br><br><i>Control:</i> placebo | Wheezing mentioned in the definition of lower respiratory tract illness (persistent wheezing or cough observed on 2 or more consecutive days).                                                                                                                                                                   | No definition provided |
| <b>Vesikari, 2006</b> [59]                           | United Kingdom | Healthy children age 6-36 months enrolled in daycare (N=1784) | No | <i>Intervention:</i> CAIV-T<br><br><i>Control:</i> Placebo vaccine                                                                                                                                                                                              | Children with clinically confirmed respiratory illness with wheeze were excluded.<br><br>Surveillance through phone contacts, clinic visits and home visits. Nasal swabs for influenza testing were collected if patient had wheezing or shortness of breath, pulmonary congestion, pneumonia, or ear infection. | No definition provided |
| <b>Studies of children <math>\geq</math> 2 years</b> |                |                                                               |    |                                                                                                                                                                                                                                                                 |                                                                                                                                                                                                                                                                                                                  |                        |
| <b>Belshe, 2000</b> [60]                             | United States  | Children age 26-85 months who participated in the             | No | <i>Intervention:</i> Trivalent cold-adapted influenza vaccine                                                                                                                                                                                                   | Parents were asked about symptoms of influenza including “wheeze, shortness of breath and pulmonary congestion”                                                                                                                                                                                                  | No definition provided |

|                            |                                                                                              |                                                                                       |     |                                                                                                                                                                                                                                    |                                                                                                                                                                                                                                                              |                        |
|----------------------------|----------------------------------------------------------------------------------------------|---------------------------------------------------------------------------------------|-----|------------------------------------------------------------------------------------------------------------------------------------------------------------------------------------------------------------------------------------|--------------------------------------------------------------------------------------------------------------------------------------------------------------------------------------------------------------------------------------------------------------|------------------------|
|                            |                                                                                              | first year of a previous influenza trial (N=1358)                                     |     | <i>Control:</i> Placebo vaccine                                                                                                                                                                                                    | through surveillance by the study.                                                                                                                                                                                                                           |                        |
|                            |                                                                                              |                                                                                       |     |                                                                                                                                                                                                                                    | The case definition of a LRI was “any physician-diagnosed croup, bronchitis, pneumonia or wheezing”                                                                                                                                                          |                        |
| <b>Esposito, 2014</b> [61] | Italy                                                                                        | Children age 36-59 months with a history of reoccurring respiratory infections (N=70) | Yes | <i>Intervention:</i> Intramuscular dose of split-virion trivalent influenza vaccine.<br><br><i>Control:</i> No injection                                                                                                           | Parents recorded symptoms of respiratory infection and LRI. Wheeze included as a symptom of LRI                                                                                                                                                              | No definition provided |
| <b>Jain, 2013</b> [62]     | Bangladesh, Dominican Republic, Honduras, Lebanon, Panama, the Philippines, Thailand, Turkey | Healthy children age 3-8 years. (N=5220)                                              | No  | <i>Intervention:</i> Quadrivalent influenza vaccine (QIV)<br><br><i>Control:</i> Hepatitis A vaccine                                                                                                                               | Wheeze included as a symptom of physician confirmed LRI                                                                                                                                                                                                      | No definition provided |
| <b>Schuller, 1983</b> [63] | United States                                                                                | Children with recurrent otitis media age 2-6 years (N=72).                            | No  | <i>Intervention 1:</i> no routine medication<br><br><i>Intervention 2:</i> Antihistamines whenever nasally congested<br><br><i>Intervention 3:</i> Daily sulfisoxazole (500 mg x 2 day)<br><br><i>Intervention 4:</i> pneumococcal | Definition for bronchospasm: improvement of wheezing after administration of subcutaneous epinephrine or inhaled isoetharine, and in those who were able to cooperate (81%) by improvement in FEV in 1 second of over 20% after inhalation of isoproterenol. | No definition provided |

vaccine

*Intervention 5:* pneumococcal  
vaccine and sulfisoxazole

Supplementary Table 4c: Clinical trials of children < 5 years reporting definitions of respiratory symptoms other than wheeze

| Author                                            | Country(s)    | Participants                                                                                                                      | Included children w/ history of wheeze | Intervention & Control                                                                                                                                                                     | Wheeze Description                                                                                                                                                                                                      | Wheeze Severity Definition |
|---------------------------------------------------|---------------|-----------------------------------------------------------------------------------------------------------------------------------|----------------------------------------|--------------------------------------------------------------------------------------------------------------------------------------------------------------------------------------------|-------------------------------------------------------------------------------------------------------------------------------------------------------------------------------------------------------------------------|----------------------------|
| <b>Studies including children age &lt;2 years</b> |               |                                                                                                                                   |                                        |                                                                                                                                                                                            |                                                                                                                                                                                                                         |                            |
| <b>Belshe, 1982</b> [32]                          | United States | Children 6-47 months identified during health maintenance visits to pediatricians (N=510)                                         | No                                     | <i>Intervention:</i> Live RSV virus vaccine<br><br><i>Control:</i> Placebo vaccine                                                                                                         | No specific wheeze definition. Parents completed checklist of adverse events each day. Study personnel confirmed symptoms in person. Illness was characterized by laryngotracheobronchitis and wheezing in one patient. | No definition provided     |
| <b>Luaguer, 2002</b> [64]                         | Germany       | Children followed up at 3, 4.5, 6 and 15 months (N=10,271 vaccinated; 2924 families agreed to participate in the follow-up study) | No                                     | <i>Intervention:</i> Acellular DTP vaccine ( <i>Wyeth-Lederle Vaccines and Pediatrics</i> )<br><br><i>Control:</i> Whole cell DTP vaccine ( <i>Wyeth-Lederle Vaccines and Pediatrics</i> ) | No mention of wheeze/ bronchospasm/ asthma/ allergy; Parents reported on cough illness > 14 weeks with any other symptoms via phone.                                                                                    | No definition provided     |
| <b>Luo, 2013</b> [65]                             | China         | Children 6-36 months (N=300)                                                                                                      | No                                     | <i>Intervention:</i> Seasonal trivalent influenza vaccine [TIV] consisting of influenza A(H1N1), A(H3N2) and B viruses (GlaxoSmithKline)<br><br><i>Controls:</i> Two 2010–2011 TIVs        | No mention of wheeze/ bronchospasm/ asthma; one mention of allergy - not specified                                                                                                                                      | No definition provided     |

manufactured by Sanofi  
Pasteur and Sinovac Biotech

|                           |                    |                                           |    |                                                                                                                                                  |                                                                                                                                                                                   |                                                                                                                                                                                                                                                                                                                                                                                                      |
|---------------------------|--------------------|-------------------------------------------|----|--------------------------------------------------------------------------------------------------------------------------------------------------|-----------------------------------------------------------------------------------------------------------------------------------------------------------------------------------|------------------------------------------------------------------------------------------------------------------------------------------------------------------------------------------------------------------------------------------------------------------------------------------------------------------------------------------------------------------------------------------------------|
| <b>Lusingu, 2010</b> [66] | Kenya and Tanzania | Children 5-17 months (894)                | No | <p>Intervention: RTS,S/AS01E (GlaxoSmithKline [GSK] Biologicals, Belgium)</p> <p>Control: Human Diploid Cell Rabies Vaccine (Sanofi-Pasteur)</p> | No mention of wheeze/ bronchospasm/ asthma/allergy; one mention of upper respiratory tract infection - not specified                                                              | <p>No definition provided</p> <p>SAEs were classified according to the preferred term in the Medical Dictionary for Regulatory Activities (MedDRA). The intensity of all AEs was graded from 1 to 3, with 3 being the most severe (0=usual; 1= less than usual/no effect on normal activity; 2=interferes with normal activity; 3=prevents normal activity) None specific to respiratory illness</p> |
| <b>Lucero, 2009</b> [67]  | The Philippines    | Children 6 weeks to < 6 months (N=12,191) | No | <p><i>Intervention:</i> 11-valent pneumococcal conjugate vaccine (Sanofi Pasteur)</p> <p><i>Control:</i> Placebo vaccine (saline)</p>            | No mention of wheeze/ bronchospasm/ asthma/ allergy; Acute bronchiolitis was included as part of pneumonia definition according to the WHO Adverse Reaction Terminology (WHO-ART) | A severe adverse event (SAE) was defined as any untoward medical occurrence after immunization that resulted in death, was life threatening, required in-patient                                                                                                                                                                                                                                     |

|                             |           |                                             |    |                                                                                                                                                                                                                                                    |                                                                                                  |                                                                                                                                  |
|-----------------------------|-----------|---------------------------------------------|----|----------------------------------------------------------------------------------------------------------------------------------------------------------------------------------------------------------------------------------------------------|--------------------------------------------------------------------------------------------------|----------------------------------------------------------------------------------------------------------------------------------|
|                             |           |                                             |    |                                                                                                                                                                                                                                                    |                                                                                                  | hospitalization or prolonged existing hospitalization, or resulted in persistent or significant disability/incapacity. (WHO-ART) |
| <b>Marshall, 2012</b> [68]  | Australia | Healthy children 18-36 months of age (N=99) | No | <i>Intervention:</i> Meningococcal Bivalent rLP2086 vaccine<br><br><i>Control:</i> Hepatitis A vaccine/placebo control                                                                                                                             | 1 episode of asthma reported as an SAE in the vaccine group in a child with a history of wheeze. | No definition provided for severity of adverse events that were not local in nature.                                             |
| <b>Mendelma, 2001</b> [69]  | Australia | Healthy children 18-36 months of age (N=99) | No | <i>Intervention:</i> Bivalent rLP2086 vaccine at 0, 1 and 6 months<br><br><i>Control:</i> Hepatitis A vaccine/placebo control                                                                                                                      | 1 episode of asthma reported as an SAE in the vaccine group in a child with a history of wheeze. | No definition provided for severity of adverse events that were not local in nature.                                             |
| <b>Mihrshahi, 2001</b> [70] | Australia | Pregnant women and unborn children (N=616)  | No | <i>Intervention 1:</i> Placebo diet, no dust mite reduction<br><br><i>Intervention 2:</i> Placebo diet, active dust mite reduction<br><br><i>Intervention 3:</i> Active diet, no dust mite reduction<br><br><i>Intervention 4:</i> Active diet and | Parental questionnaire of respiratory symptoms and clinical assessment of respiratory status     | No definition provided                                                                                                           |

dust mite reduction

|                           |        |                                                                                                                                |    |                                                                                                                                                                                                                                                                     |                                                                                                                                                                                                                                                                                                                                                                                         |                                                                                                     |
|---------------------------|--------|--------------------------------------------------------------------------------------------------------------------------------|----|---------------------------------------------------------------------------------------------------------------------------------------------------------------------------------------------------------------------------------------------------------------------|-----------------------------------------------------------------------------------------------------------------------------------------------------------------------------------------------------------------------------------------------------------------------------------------------------------------------------------------------------------------------------------------|-----------------------------------------------------------------------------------------------------|
| <b>Munoz, 2014</b> [71]   | USA    | 48 pregnant mothers whose infants were followed up from birth to 2 months of age                                               | No | <p>Intervention: Tdap vaccine (Adacel, Sanofi Pasteur) given at 30-32 weeks gestation.</p> <p>Control: Placebo (saline control)</p>                                                                                                                                 | Bronchiolitis requiring hospitalization, respiratory distress/tachypnea reported as a moderate SAE.                                                                                                                                                                                                                                                                                     | Bronchiolitis requiring hospitalization, respiratory distress/tachypnea reported as a moderate SAE. |
| <b>Nilsson, 1998</b> [72] | Sweden | Infants age 2 months enrolled in a pertussis vaccine trial and followed to age 36 months for a secondary allergy study (N=711) | No | <p><i>Intervention 1:</i> 2-component acellular pertussis vaccine</p> <p><i>Intervention 2:</i> 5-component acellular pertussis vaccine</p> <p><i>Intervention 3:</i> Whole-cell pertussis vaccine</p> <p><i>Control:</i> Diphtheria and tetanus toxoid vaccine</p> | <p>Asthma was diagnosed using a modified International Study of Asthma and Allergies in Childhood questionnaire, clinical findings, and information in medical records.</p> <p>Bronchial asthma was defined as at least 3 episodes of obstructive bronchitis before 2 years of age or 1 episode of bronchial obstruction after 2 years of age in the absence of other explanations.</p> | No definition provided                                                                              |



|                                 |               |                                                                  |    |                                                                                                          |                                                                                                    |                        |
|---------------------------------|---------------|------------------------------------------------------------------|----|----------------------------------------------------------------------------------------------------------|----------------------------------------------------------------------------------------------------|------------------------|
| <b>Palmu, 2014</b><br>[73]      | Australia     | Healthy children 6-35 months (N=3318).                           | No | <i>Intervention 1:</i> 0.25ml Trivalent inactivated influenza vaccine (TIV) <i>Fluarix</i> <sup>TM</sup> | Asthma, allergy and bronchiolitis were related SAEs.                                               | None provided          |
|                                 |               |                                                                  |    | <i>Intervention 2:</i> 0.5ml <i>Fluarix</i> <sup>TM</sup>                                                |                                                                                                    |                        |
|                                 |               |                                                                  |    | <i>Control:</i> <i>Fluzone</i> <sup>®</sup>                                                              |                                                                                                    |                        |
| <b>Piedra, 2005</b> [3]         | United States | Children age 18 months-18 years (N=11096)                        | No | <i>Intervention:</i> LAIV-T                                                                              | Medical encounters with ICD-9 codes for asthma, and "Medically attended acute respiratory illness" | No definition provided |
|                                 |               |                                                                  |    | <i>Control:</i> Pre-vaccination time period (cross-over design)                                          |                                                                                                    |                        |
| <b>Ramos-Alvarez, 1975</b> [74] | Mexico        | Children from communities near Mexico City age 1-4 years (N=346) | No | <i>Intervention 1:</i> Measles vaccine                                                                   | Clinical observations of "cough" and "bronchitis"                                                  | No definition provided |
|                                 |               |                                                                  |    | <i>Intervention 2:</i> Rubella vaccine                                                                   |                                                                                                    |                        |
|                                 |               |                                                                  |    | <i>Intervention 3:</i> Bivalent measles and rubella vaccine                                              |                                                                                                    |                        |
|                                 |               |                                                                  |    | <i>Control:</i> Placebo vaccine                                                                          |                                                                                                    |                        |

|                                                                                        |                                                                                     |                                                              |    |                                                                                                                                                                                     |                                                                                                                                                                                                                                                                                                                                                                                                                                                                                                                                                                                                                                 |                        |
|----------------------------------------------------------------------------------------|-------------------------------------------------------------------------------------|--------------------------------------------------------------|----|-------------------------------------------------------------------------------------------------------------------------------------------------------------------------------------|---------------------------------------------------------------------------------------------------------------------------------------------------------------------------------------------------------------------------------------------------------------------------------------------------------------------------------------------------------------------------------------------------------------------------------------------------------------------------------------------------------------------------------------------------------------------------------------------------------------------------------|------------------------|
| <b>Tam, 2007 [15]</b>                                                                  | China, Hong Kong, India, Malaysia, the Philippines, Singapore, Taiwan, and Thailand | Children age 12-36 months (N=3174)                           | No | <i>Intervention:</i> CAIV-T vaccine (MedImmune)<br><br><i>Control:</i> Placebo vaccine                                                                                              | Parents and guardians recorded any adverse events occurring within 11 days after vaccination.                                                                                                                                                                                                                                                                                                                                                                                                                                                                                                                                   | No definition provided |
| <b>Wright, 1976 [13]</b>                                                               | United States                                                                       | Healthy children age 11-19 months enrolled in daycare (N=34) | No | <i>Intervention:</i> RSV vaccine<br><br><i>Control:</i> Placebo vaccine                                                                                                             | Daily clinical observations including temperature, respiratory rate, quantification of coughs and rhinorrhea.                                                                                                                                                                                                                                                                                                                                                                                                                                                                                                                   | No definition provided |
| <b>Studies of children <math>\geq</math> 2 years</b>                                   |                                                                                     |                                                              |    |                                                                                                                                                                                     |                                                                                                                                                                                                                                                                                                                                                                                                                                                                                                                                                                                                                                 |                        |
| <b>American Lung Association Asthma Clinical Research Centers (ALAACRC), 2001 [75]</b> | USA                                                                                 | 2032 patients, 3-64 years (712 children: 3-17 years)         | No | <i>Intervention:</i> Heat-killed trivalent split-virus influenza type A and B vaccine (Fluzone, Aventis-Pasteur)<br><br><i>Control:</i> Identical-appearing placebo saline solution | Asthma defined as "physician diagnosed asthma". Outcomes were defined as exacerbation of asthma within 14 days after injection:<br>a. decrease of at least 30% in peak expiratory flow rate from second-highest morning peak expiratory flow rate measured during study<br>b. increase in daily use of bronchodilator rescue<br>c. increase in the use of systemic corticosteroids for asthma<br>d. unscheduled use of healthcare for asthma treatment<br>e. number of days without symptoms of asthma<br>f. amount of time lost from work or school due to asthma<br>g. increase in medication for long term control of asthma | No definition provided |

|                            |       |                                                                                                                                   |     |                                                                                                                                                                                                                                                  |                                                                                                                                                                                                                                                                                                                                                                                        |                                                                                        |
|----------------------------|-------|-----------------------------------------------------------------------------------------------------------------------------------|-----|--------------------------------------------------------------------------------------------------------------------------------------------------------------------------------------------------------------------------------------------------|----------------------------------------------------------------------------------------------------------------------------------------------------------------------------------------------------------------------------------------------------------------------------------------------------------------------------------------------------------------------------------------|----------------------------------------------------------------------------------------|
| <b>Marcucci, 2005</b> [76] | Italy | Children (4-15 years) with respiratory symptoms due to monosensitization to house dust mites (N=24)                               | Yes | <p><i>Intervention:</i> Sub-lingual immunotherapy (SLIT) 4 µg of the major allergen for Group 1 and 2 µg of the major mite allergen for Group 2</p> <p><i>Control:</i> Placebo (same composition and presentation but contained no allergen)</p> | Asthma defined as "cough and breathlessness" as recorded through patients diary cards                                                                                                                                                                                                                                                                                                  | Used a 0-3 scale of severity of symptoms: 0=no symptoms, 1=mild, 2=moderate, 3=serious |
| <b>Ming, 2013</b> [77]     | China | Children age 4-12 years with newly diagnosed, uncontrolled, moderate bronchial asthma (N= 24)                                     | Yes | <p><i>Intervention:</i> Inactivated <i>M. pheli</i></p> <p><i>Control:</i> Salmeterol xinafoate and fluticasone treatment</p>                                                                                                                    | <p>Asthma was diagnosed using a modified International Study of Asthma and Allergies in Childhood questionnaire, clinical findings, and information in medical records</p> <p>Bronchial asthma was defined as at least 3 episodes of obstructive bronchitis before 2 years of age or 1 episode of bronchial obstruction after 2 years of age in the absence of other explanations.</p> | No definition provided                                                                 |
| <b>Sugaya, 1994</b> [78]   | Japan | Children with moderate to severe asthma age 2-14 (N=137)                                                                          | Yes | <p><i>Intervention:</i> Inactivated trivalent subunit antigen vaccines</p> <p><i>Control:</i> No vaccine</p>                                                                                                                                     | Reported asthma attacks resulting in hospitalization                                                                                                                                                                                                                                                                                                                                   | No definition provided                                                                 |
| <b>Tanaka, 1993</b> [79]   | Japan | Hospitalized children and adults with bronchial asthma or severe psychomotor retardation (N=153, including 45 asthmatic children) | Yes | <p><i>Intervention:</i> Trivalent cold recombinant influenza vaccine</p> <p><i>Control:</i> Placebo vaccine</p>                                                                                                                                  | Asthma attacks were recorded by physicians                                                                                                                                                                                                                                                                                                                                             | No definition provided                                                                 |

**SUPPLEMENTARY TABLE 5: CHARACTERISTICS OF WHEEZE DEFINITIONS IN TRIAL SETTINGS THAT INCLUDE CHILDREN < 5 YEARS**

| CHARACTERISTICS OF WHEEZE DEFINITIONS    | STUDIES REPORTING THIS CHARACTERISTIC                                                                                                                                                                                                                                                                                                                                                                                                                                                                                                                                                     | FREQUENCY<br>(Supplementary<br>4A* studies) |
|------------------------------------------|-------------------------------------------------------------------------------------------------------------------------------------------------------------------------------------------------------------------------------------------------------------------------------------------------------------------------------------------------------------------------------------------------------------------------------------------------------------------------------------------------------------------------------------------------------------------------------------------|---------------------------------------------|
| <b>ASSESSOR QUALIFICATIONS</b>           |                                                                                                                                                                                                                                                                                                                                                                                                                                                                                                                                                                                           |                                             |
| Caregiver (Parent/Guardian)              | Belshe 2007, Corver 2006, Luabeya 2012, Marucci 2005, Mirshahi 2001, Miller 2011, Ming 2013, Nilsson 1998, Piedra 1993, Piedra 2002, Schonbeck 2005, Belshe 1982, Belshe 1998, Belshe 2000, Douglas 1984, Esposito 2003, Esposito 2007, Esposito 2010, Esposito 2014, Jansen 2009, Vesikari 2006, Rose 2010, Ashkenazi 2006, Jahani 2012, Kiraly 2013, Tam 2007, Belshe 1992, Bergen 2004                                                                                                                                                                                                 | 21 (7)                                      |
| Health Worker                            | Ortiz 2015, Brooks-Zaman-CDC-PATH, Diallo-PATH, Mirshahi 2001, Madhu 2005, Piedra 1990, Piedra 2002, Schonbeck 2005, Greenhawt 2012, Jain 2013, Nilsson 1998, Piedra 1996, Englund 2013, Belshe 2007, Piedra 2005, Schuller 1982, Malkin 2013, Piedra 1993, Steinhoff 1990, Anderson 1992, Vesikari 2006, Wright 1976, Belshe 1992, Bergen 2008, Lum 2010 (“bronchospasm”), Luabeya 2012, Belshe 1982, Belshe 1998, Belshe 2000, Clements 1996, Douglas 1984, Esposito 2003, Esposito 2007, Esposito 2010, Esposito 2014, Jansen 2009, Rose 2010, Ashkenazi 2006, Ming 2013, Gaglani 2008 | 40 (9)                                      |
| <b>HEALTH WORKER QUALIFICATIONS</b>      |                                                                                                                                                                                                                                                                                                                                                                                                                                                                                                                                                                                           |                                             |
| Physician                                | Ortiz 2015, Brooks-Zaman-CDC-PATH, Diallo-PATH, Madhu 2005, Piedra 1990, Piedra 2002, Schonbeck 2005, Greenhawt 2012, Jain 2013                                                                                                                                                                                                                                                                                                                                                                                                                                                           | 10 (5)                                      |
| Study nurse                              | Nilsson 1998, Piedra 1996, Englund 2013                                                                                                                                                                                                                                                                                                                                                                                                                                                                                                                                                   | 3 (0)                                       |
| Health worker (description not provided) | Belshe 2007, Piedra 2005; Schuller 1982, Malkin 2013, Piedra 1993, Steinhoff 1990, Anderson 1992, Vesikari 2006, Wright 1976, Belshe 1992, Bergen 2008, Lum 2010 (“bronchospasm”), Luabeya 2012, Belshe 1982, Belshe 1998, Belshe 2000, Clements 1996, Douglas 1984, Esposito 2003, Esposito 2007, Esposito 2010, Esposito 2014, Jansen 2009, Rose 2010, Ashkenazi 2006, Ming 2013, Gaglani 2008                                                                                                                                                                                          | 27 (7)                                      |
| <b>NUMBER OF ASSESSORS</b>               |                                                                                                                                                                                                                                                                                                                                                                                                                                                                                                                                                                                           |                                             |
| 1 assessor – Caregiver only              | Corver 2006, Marucci 2005, Kiraly 2013, Miller 2011, Marshall 2012 ,                                                                                                                                                                                                                                                                                                                                                                                                                                                                                                                      | 5 (1)                                       |
| 1 assessor – Health Worker only          | Ortiz 2015, Brooks-Zaman-CDC-PATH, Diallo-PATH, Madhu 2005, Malkin 2013, Piedra 1990, Piedra 1996,                                                                                                                                                                                                                                                                                                                                                                                                                                                                                        | 20 (7)                                      |

|                                                                                      |                                                                                                                                                                                                                                                                                          |                             |
|--------------------------------------------------------------------------------------|------------------------------------------------------------------------------------------------------------------------------------------------------------------------------------------------------------------------------------------------------------------------------------------|-----------------------------|
|                                                                                      | Piedra 2005, Greenhawt 2014, Jain 2013, Englund 2013, Schuller 1982, Steinhoff 1990, Anderson 1992, Wright 1976, Belshe 1992, Lum 2010, Clements 1996, Belshe 1982, Custovic 2002                                                                                                        |                             |
| > 1 assessor–Both Caregiver and Health Worker                                        | Belshe 2007 Mirshahi 2000, Ming 2013, Nilsson, Piedra 1993, Piedra 2002, Gaglani 2008, Piedra 2002, Schonbeck 2005, Steinhoff 1990, Belshe 1982, Belshe 1998, Belshe 2000, Douglas 1984, Esposito 2007, Esposito 2010, Esposito 2014, Jansen 2009, Vesikari 2006, Rose 2010, Bergen 2004 | 21 (4)                      |
| <b>HEALTH WORKER EXAMINATION DETAILS</b>                                             |                                                                                                                                                                                                                                                                                          |                             |
| Wheeze audible without a stethoscope                                                 | Ortiz 2015, Brooks-Zaman-CDC-PATH, Diallo-PATH, Piedra 1990, Piedra 1993                                                                                                                                                                                                                 | 5 (4)                       |
| Wheeze on auscultation                                                               | Belshe 1992, Ortiz 2015, Brooks-Zaman-CDC-PATH, Diallo-PATH, Madhu 2005, Piedra 1990, Piedra 1993, Piedra 1996, Englund 2013                                                                                                                                                             | 9 (6)                       |
| Characteristic findings of wheeze on auscultation                                    | Ortiz 2015, Diallo-PATH and Brooks-Zaman-CDC-PATH: <i>“Long high-pitched whistling or musical sound on expiration heard by auscultation over the lung fields.”</i> Piedra 1990: <i>“Wheeze: musical sound on expiration; Rhonchi on auscultation”</i>                                    | 4 (4)                       |
| Bronchodilator response                                                              | Schuller 1982 ( <i>“Bronchospasms proved by improvement of wheezing after administration of subcutaneous epinephrine or inhaled isoetharine or improvement of lung function tests “</i> )                                                                                                | 1 (0)                       |
| Additional tests: pulmonary function test <sup>a</sup> /plethysmography <sup>b</sup> | Ming 2013 <sup>a</sup> , Schuller 1982 <sup>a</sup> , Custovic 2002 <sup>b</sup>                                                                                                                                                                                                         | 3 (1)                       |
| <b>TIMING OF WHEEZE OR WHEEZE EQUIVALENT</b>                                         |                                                                                                                                                                                                                                                                                          |                             |
| Reference made to timing of wheeze or wheeze equivalent                              | Greenhawt 2012, Tam 2007, ALLACRC 2001, Belshe 2007, Rose 2010, Kiraly 2013, Corver 2006                                                                                                                                                                                                 | 7 (4)                       |
| Within minutes/hours                                                                 | Greenhawt 2012 – <i>“Clinician observed patient for 30 minutes for symptoms of allergy including wheeze”</i> – Influenza vaccine                                                                                                                                                         | 1 (1)                       |
| Within days                                                                          | Tam 2007 – <i>“Any adverse event within 11 days after vaccination”</i> – Influenza vaccine                                                                                                                                                                                               | 1 (0)                       |
| Within weeks                                                                         | ALLACRC 2001 – <i>“Exacerbation of asthma within 14 days after injection”</i> – Influenza vaccine                                                                                                                                                                                        | 1 (0)                       |
| Within months                                                                        | Belshe 2007 – <i>“Wheezing within 42 days after the administration of dose 1”</i> - Influenza vaccine<br><br>Rose 2010 – <i>“2 episodes during past 12 months with 1 episode within past 3 months”</i> - <i>Lactobacillus rhamnosus</i>                                                  | 1 (1)<br><br>1 (0)<br>1 (1) |

|                                                                                               |                                                                                                                             |         |
|-----------------------------------------------------------------------------------------------|-----------------------------------------------------------------------------------------------------------------------------|---------|
|                                                                                               | Kiraly 2013 – “Ever wheeze or wheeze in past 12 months” – BCG vaccination and Vitamin A supplementation                     |         |
| Within years                                                                                  | Corver 2006 – “Wheezing during first 4 years of life” - Polyester-cotton mite allergen impermeable mattress & pillow covers | 1 (1)   |
| OPERATIONALIZATION OF ASSESSMENT                                                              |                                                                                                                             |         |
| Questionnaire                                                                                 | Mirshahi 2000, Ming 2013, Nilsson 1998, Corver 2006                                                                         | 4 (1)   |
| Diaries/ checklists/ symptom score cards                                                      | Douglas 1984, Esposito 2007, Esposito 2010, Esposito 2014, Jansen 2009, Rose 2010, Ashkenazi 2006, Jahani 2012, Belshe 1982 | 9 (4)   |
| Telephone interview/contact                                                                   | Vesikari 2006, Piedra 1996, Bergen 2004                                                                                     | 3 (0)   |
| Home visits                                                                                   | Vesikari 2006, Piedra 1996, Ashkenazi 2006, Anderson 1992, Rose 2010                                                        | 5 (1)   |
| Facility based patient presentation                                                           | Most studies in which assessments are made by health workers                                                                | 40 (11) |
| ICD-9 codes for asthma/ reactive airway disease/ medically attended acute respiratory illness | Gaglani 2008, Piedra 2005                                                                                                   | 2 (1)   |

Supplementary Table 4A studies: An explicit wheeze definition is provided.

**SUPPLEMENTARY TABLE 6: CATEGORIES OF SEVERITY ASSESSMENT OF WHEEZE IN TRIAL SETTINGS THAT INCLUDE CHILDREN < 5 YEARS**

| Author                                                                                          | Tachypnea            | Lower chest wall indrawing | Grunting | Inability to talk/drink /breastfeed | Cyanosis  | Pulse oximetry | BGA | Required Bronchodilator                           | Other                                                                                | DAIDS severity grades ascertained* |
|-------------------------------------------------------------------------------------------------|----------------------|----------------------------|----------|-------------------------------------|-----------|----------------|-----|---------------------------------------------------|--------------------------------------------------------------------------------------|------------------------------------|
| Supplementary Table 4A studies which included specific wheeze definitions in children < 2 years |                      |                            |          |                                     |           |                |     |                                                   |                                                                                      |                                    |
| <b>Belshe 1992</b>                                                                              | -                    | -                          | -        | -                                   |           | -              | -   | "wheeze did not require bronchodilator treatment" | "intermittent", "mild"                                                               | Grade 1                            |
| <b>Belshe 2007</b>                                                                              | Respiratory distress |                            |          |                                     | Hypoxemia |                |     | "with a prescription for a daily bronchodilator"  |                                                                                      | Grade 1<br>Grade 2<br>Grade 3      |
| <b>Douglas</b>                                                                                  | -                    | -                          | -        | +                                   | -         | -              | -   | +                                                 | Recorded whether wheeze required medication, restricted activity or hospitalization, | Grade 1<br>Grade 3                 |
| <b>Englund</b>                                                                                  | -                    | -                          | -        | -                                   | -         | -              | -   | -                                                 | All LRIs were defined as serious adverse events including wheeze.                    | Grade 1                            |
| <b>Gaglani</b>                                                                                  | -                    | -                          | -        | -                                   | -         | -              | -   | -                                                 | "medically attended wheeze"                                                          | Grade 3                            |
| <b>Mihrshahi</b>                                                                                | -                    | -                          | -        | -                                   | -         | -              | -   | -                                                 | Wheeze Frequency<br>1–2 episodes, 2–3 episodes, more than 4 episodes, or persistent. | Grade 1<br>Grade 4                 |

|                                                                                                                        |   |   |   |   |   |   |   |   |                                                                                                                                                                                                                                                                                             |                    |
|------------------------------------------------------------------------------------------------------------------------|---|---|---|---|---|---|---|---|---------------------------------------------------------------------------------------------------------------------------------------------------------------------------------------------------------------------------------------------------------------------------------------------|--------------------|
|                                                                                                                        |   |   |   |   |   |   |   |   | Duration (that lasted a week or more)<br>Use of asthma medication (persistent asthma)<br>Requiring hospitalization                                                                                                                                                                          |                    |
| <b>Munoz</b>                                                                                                           | + | - | - | - | - | - | - | - | Related moderate adverse event included: Respiratory distress/tachypnea.<br><br>Bronchiolitis requiring Hospitalization,                                                                                                                                                                    | Grade 1<br>Grade 4 |
| <b>Nilsson</b>                                                                                                         | - | - | - | + | - | - | - | - | 1. Wheezing/whistling in the chest in the last 12 months?<br><br>2. Number of episodes (frequency) in the last 12 months?<br><br>3. Number of nights/week (frequency) disturbed by wheezing in the last 12 months?<br><br>4. "So severe could only say 1 to 2 words between the breathing". | Grade 3<br>Grade 4 |
| <b>Supplementary Table 4A studies which included specific wheeze definitions in children <math>\geq 2</math> years</b> |   |   |   |   |   |   |   |   |                                                                                                                                                                                                                                                                                             |                    |
| <b>Ortiz</b>                                                                                                           | + | + | - | - | - | + | - | - | 1. Mild: wheezing illness without other findings associated with                                                                                                                                                                                                                            | Grade 1<br>Grade 3 |



|                          |   |   |   |   |   |   |   |   |                                                                                                                                                                                                                                                                                                                                                                          |                                                             |
|--------------------------|---|---|---|---|---|---|---|---|--------------------------------------------------------------------------------------------------------------------------------------------------------------------------------------------------------------------------------------------------------------------------------------------------------------------------------------------------------------------------|-------------------------------------------------------------|
|                          |   |   |   |   |   |   |   |   | <p>moderate, severe, or life threatening severity.</p> <p>2. Moderate: Nasal flaring OR chest indrawing OR Pulse oximetry 90 – 95%.</p> <p>3. Severe: Dyspnea at rest causing inability to perform usual social &amp; functional activities OR Pulse oximetry &lt; 90%.</p> <p>4. Life threatening.</p>                                                                  | <p>Grade 3</p> <p>Grade 4</p>                               |
| <b>Brooks-Zaman-PATH</b> | + | + | - | - | - | + | - | - | <p>1. Mild: wheezing illness without other findings associated with moderate, severe, or life threatening severity.</p> <p>2. Moderate: Nasal flaring OR chest indrawing OR Pulse oximetry 90 – 95%.</p> <p>3. Severe: Dyspnea at rest causing inability to perform usual social &amp; functional activities OR Pulse oximetry &lt; 90%.</p> <p>4. Life threatening.</p> | <p>Grade 1</p> <p>Grade 2</p> <p>Grade 3</p> <p>Grade 4</p> |
| <b>Diallo-PATH</b>       | + | + | - | - | - | + | - | - | <p>1. Mild: wheezing illness as above without other findings associated with moderate, severe, or life threatening severity.</p> <p>2. Moderate: Nasal flaring OR chest indrawing OR Pulse oximetry 90 – 95%.</p> <p>3. Severe: Dyspnea at rest causing</p>                                                                                                              | <p>Grade 1</p> <p>Grade 2</p> <p>Grade 3</p> <p>Grade 4</p> |

|                                                                                                                                  |   |   |   |   |   |   |   |   |                                                                                                                                                                                                                                                                                                                                                                                                                                                                                                                                                                                                                   |                               |
|----------------------------------------------------------------------------------------------------------------------------------|---|---|---|---|---|---|---|---|-------------------------------------------------------------------------------------------------------------------------------------------------------------------------------------------------------------------------------------------------------------------------------------------------------------------------------------------------------------------------------------------------------------------------------------------------------------------------------------------------------------------------------------------------------------------------------------------------------------------|-------------------------------|
|                                                                                                                                  |   |   |   |   |   |   |   |   | inability to perform usual social & functional activities OR Pulse oximetry < 90%.<br>4. Life threatening.                                                                                                                                                                                                                                                                                                                                                                                                                                                                                                        |                               |
| Supplementary Table 4B studies including non-specific wheeze definition or wheeze as a symptom of another disease in children <2 |   |   |   |   |   |   |   |   |                                                                                                                                                                                                                                                                                                                                                                                                                                                                                                                                                                                                                   |                               |
| <b>Madhi</b>                                                                                                                     | + | + | - | + | + | - | - | - | WHO-definitions of pneumonia severity: Mild pneumonia was defined as cough of <14days duration in a child with tachypnea (defined as >50 breaths/min in children <12 months of age and >140 breaths/min in children >12 months of age) in the absence of lower chest wall in-drawing or other signs and symptoms of WHO-defined severe pneumonia. WHO-defined severe pneumonia was defined as a cough of <14 days duration in a child with lower chest wall indrawing and/or any of the following signs and symptoms of severe pneumonia: feeding difficulties, convulsions, central cyanosis, or encephalopathy. | Grade 1<br>Grade 2<br>Grade 3 |
| <b>Malkin</b>                                                                                                                    | - | - | - | - | - | - | - | - | Adverse events were classified as: Mild, Moderate and Severe. No further definitions although hospitalization/ resulting to death was considered severe.                                                                                                                                                                                                                                                                                                                                                                                                                                                          | Grade 3<br>Grade 4            |
| <b>Ming</b>                                                                                                                      | - | - | - | - | - | - | - | - | Safety and tolerability were                                                                                                                                                                                                                                                                                                                                                                                                                                                                                                                                                                                      | Grade 3                       |

|                     |   |   |    |   |   |   |   |   |                                                                                                                                                                                                                                                                                                                                                                      |                                          |
|---------------------|---|---|----|---|---|---|---|---|----------------------------------------------------------------------------------------------------------------------------------------------------------------------------------------------------------------------------------------------------------------------------------------------------------------------------------------------------------------------|------------------------------------------|
|                     |   |   |    |   |   |   |   |   | assessed in terms of frequency, duration and severity of adverse events and the registered relationship to the test drug; causing death, carcinogenic, teratogenic and permanent damage to the organ; life-threatening resulting in hospitalization; special treatment with adverse reactions; clinically significant changes in laboratory measure and vital signs; | Grade 4                                  |
| <b>Nolan, 2008</b>  | - | - | -  | + | - | - | - | - | AE graded in intensity from 0 to 4, where 0 was “absent/none” and an intensity of 4 represented an event that was “disabling” or had “life threatening consequences”.                                                                                                                                                                                                | Grade 3<br>Grade 4                       |
| <b>Nolan, 2009</b>  | - | - | -  | - | - | - | - | - | Parents graded severity of adverse of events. No classification provided.                                                                                                                                                                                                                                                                                            | N/A                                      |
| <b>Piedra, 1996</b> | - | - | -  | - | - | - | - | - | An SAE was defined as an event that was fatal; was immediately life-threatening; or resulted in or prolonged a hospitalization, a permanent or substantial disability, an important medical event, or a congenital anomaly (an offspring of participant regardless of the time to diagnosis).                                                                        | Grade 3<br>Grade 4                       |
| <b>Piedra, 2002</b> | + | + | -- | - | + | - | + | - | None provided, however comment on the include signs such as tachypnea, sternal retraction, cyanosis and arterial oxygen; level of respiratory support e.g. FiO2, PEEP, PIP, MAP, CPAP, and                                                                                                                                                                           | Grade 1<br>Grade 2<br>Grade 3<br>Grade 4 |

|                                                                                                                                                |   |   |   |   |   |   |   |   |                                                                                                                                                                    |         |
|------------------------------------------------------------------------------------------------------------------------------------------------|---|---|---|---|---|---|---|---|--------------------------------------------------------------------------------------------------------------------------------------------------------------------|---------|
|                                                                                                                                                |   |   |   |   |   |   |   |   | demand ventilation;                                                                                                                                                |         |
| Rose                                                                                                                                           | - | - | - | - | - | - | - | - | Hospitalizations reported (SAE)                                                                                                                                    | Grade 3 |
| Schonbeck                                                                                                                                      | - | - | - | - | - | - | - | - | Severity scale ranging from 1 (mild) to 3 (severe).                                                                                                                | N/A     |
| Schuller                                                                                                                                       | - | - | - | - | - | - | - | - | Hospitalizations reported (SAE)                                                                                                                                    | Grade 3 |
| Sugaya                                                                                                                                         | - | - | - | - | - | - | - | - | Hospitalizations reported (SAE)                                                                                                                                    | Grade 3 |
| Supplementary Table 4B studies including non-specific wheeze definition or wheeze as a symptom of another disease <b>in children ≥ 2 years</b> |   |   |   |   |   |   |   |   |                                                                                                                                                                    |         |
| Tam                                                                                                                                            | - | - | - | - | - | - | - | - | Hospitalizations reported (SAE)                                                                                                                                    | Grade 3 |
| Supplementary Table 4C studies including definitions of respiratory symptoms other than wheeze <b>in children ≥ 2 years</b>                    |   |   |   |   |   |   |   |   |                                                                                                                                                                    |         |
| Marcucci                                                                                                                                       | - | - | - | - | - | - | - | + | Symptom Score<br>0 = no symptoms;<br>1 = mild symptoms;<br>2 = moderate symptoms;<br>3 = serious symptoms<br>Medication score<br>Medications taken daily (systemic | N/A     |

|  |  |  |  |  |  |  |  |  |                                                                                                                                                                                           |  |
|--|--|--|--|--|--|--|--|--|-------------------------------------------------------------------------------------------------------------------------------------------------------------------------------------------|--|
|  |  |  |  |  |  |  |  |  | antihistamines, nasal chromoglycate, ocular cromoglycate, beta-2-agonist)                                                                                                                 |  |
|  |  |  |  |  |  |  |  |  | 1 point for each application of nasal &/or ocular chromoglycate, drops in both nostrils or eyes; 2 points for every inhalation of beta-2-agonist; 3 points for every antihistamine taken. |  |

\*DAIDS –Division of AIDS table for grading severity of adverse events in adult and pediatric populations. The grading system produce by DAIDS was applied to each definition to ascertain which grades of SAEs could be detected by the definition.

Supplementary Table 4A studies: An explicit wheeze definition is provided

Supplementary Table 4B studies: Wheeze is described as part of a respiratory illness without an explicit definition

Supplementary Table 4C studies: Wheeze equivalents (e.g. asthma, bronchiolitis) descriptions are provided

**SUPPLEMENTARY TABLE 7: PRISMA CHECKLIST**

| Section/topic             | #  | Checklist item                                                                                                                                                                                                                                                                                              | Reported on page #              |
|---------------------------|----|-------------------------------------------------------------------------------------------------------------------------------------------------------------------------------------------------------------------------------------------------------------------------------------------------------------|---------------------------------|
| <b>TITLE</b>              |    |                                                                                                                                                                                                                                                                                                             |                                 |
| Title                     | 1  | Identify the report as a systematic review, meta-analysis, or both.                                                                                                                                                                                                                                         | 1                               |
| <b>ABSTRACT</b>           |    |                                                                                                                                                                                                                                                                                                             |                                 |
| Structured summary        | 2  | Provide a structured summary including, as applicable: background; objectives; data sources; study eligibility criteria, participants, and interventions; study appraisal and synthesis methods; results; limitations; conclusions and implications of key findings; systematic review registration number. | 3 and 4                         |
| <b>INTRODUCTION</b>       |    |                                                                                                                                                                                                                                                                                                             |                                 |
| Rationale                 | 3  | Describe the rationale for the review in the context of what is already known.                                                                                                                                                                                                                              | 5                               |
| Objectives                | 4  | Provide an explicit statement of questions being addressed with reference to participants, interventions, comparisons, outcomes, and study design (PICOS).                                                                                                                                                  | 5                               |
| <b>METHODS</b>            |    |                                                                                                                                                                                                                                                                                                             |                                 |
| Protocol and registration | 5  | Indicate if a review protocol exists, if and where it can be accessed (e.g., Web address), and, if available, provide registration information including registration number.                                                                                                                               | Not available online            |
| Eligibility criteria      | 6  | Specify study characteristics (e.g., PICOS, length of follow-up) and report characteristics (e.g., years considered, language, publication status) used as criteria for eligibility, giving rationale.                                                                                                      | 6 and 7                         |
| Information sources       | 7  | Describe all information sources (e.g., databases with dates of coverage, contact with study authors to identify additional studies) in the search and date last searched.                                                                                                                                  | 6                               |
| Search                    | 8  | Present full electronic search strategy for at least one database, including any limits used, such that it could be repeated.                                                                                                                                                                               | 6, Supplementary Tables 2 and 3 |
| Study selection           | 9  | State the process for selecting studies (i.e., screening, eligibility, included in systematic review, and, if applicable, included in the meta-analysis).                                                                                                                                                   | 7                               |
| Data collection process   | 10 | Describe method of data extraction from reports (e.g., piloted forms, independently, in duplicate) and any processes for obtaining and confirming data from investigators.                                                                                                                                  | 7—9; Supplementary              |

|                                    |    |                                                                                                                                                                                                                        |                                  |
|------------------------------------|----|------------------------------------------------------------------------------------------------------------------------------------------------------------------------------------------------------------------------|----------------------------------|
|                                    |    |                                                                                                                                                                                                                        | Table 1                          |
| Data items                         | 11 | List and define all variables for which data were sought (e.g., PICOS, funding sources) and any assumptions and simplifications made.                                                                                  | 7-9;<br>Supplementary<br>Table 1 |
| Risk of bias in individual studies | 12 | Describe methods used for assessing risk of bias of individual studies (including specification of whether this was done at the study or outcome level), and how this information is to be used in any data synthesis. | Not Applicable                   |
| Summary measures                   | 13 | State the principal summary measures (e.g., risk ratio, difference in means).                                                                                                                                          | Not Applicable                   |
| Synthesis of results               | 14 | Describe the methods of handling data and combining results of studies, if done, including measures of consistency (e.g., $I^2$ ) for each meta-analysis.                                                              | Not Applicable                   |

Page 1 of 2

| Section/topic                 | #  | Checklist item                                                                                                                                                                                           | Reported on page #                           |
|-------------------------------|----|----------------------------------------------------------------------------------------------------------------------------------------------------------------------------------------------------------|----------------------------------------------|
| Risk of bias across studies   | 15 | Specify any assessment of risk of bias that may affect the cumulative evidence (e.g., publication bias, selective reporting within studies).                                                             | Not Applicable                               |
| Additional analyses           | 16 | Describe methods of additional analyses (e.g., sensitivity or subgroup analyses, meta-regression), if done, indicating which were pre-specified.                                                         | Not Applicable                               |
| <b>RESULTS</b>                |    |                                                                                                                                                                                                          |                                              |
| Study selection               | 17 | Give numbers of studies screened, assessed for eligibility, and included in the review, with reasons for exclusions at each stage, ideally with a flow diagram.                                          | 9, Figure 1                                  |
| Study characteristics         | 18 | For each study, present characteristics for which data were extracted (e.g., study size, PICOS, follow-up period) and provide the citations.                                                             | 9-10                                         |
| Risk of bias within studies   | 19 | Present data on risk of bias of each study and, if available, any outcome level assessment (see item 12).                                                                                                | Not Applicable                               |
| Results of individual studies | 20 | For all outcomes considered (benefits or harms), present, for each study: (a) simple summary data for each intervention group (b) effect estimates and confidence intervals, ideally with a forest plot. | Supplementary<br>Table 4                     |
| Synthesis of results          | 21 | Present results of each meta-analysis done, including confidence intervals and measures of consistency.                                                                                                  | Table 1 and 2;<br>Figure 2;<br>Supplementary |

|                             |    |                                                                                                                                                                                      |                                                     |
|-----------------------------|----|--------------------------------------------------------------------------------------------------------------------------------------------------------------------------------------|-----------------------------------------------------|
|                             |    |                                                                                                                                                                                      | Tables 5 and 6;<br>Supplementary<br>Figures 1 and 2 |
| Risk of bias across studies | 22 | Present results of any assessment of risk of bias across studies (see Item 15).                                                                                                      | Not Applicable                                      |
| Additional analysis         | 23 | Give results of additional analyses, if done (e.g., sensitivity or subgroup analyses, meta-regression [see Item 16]).                                                                | None                                                |
| <b>DISCUSSION</b>           |    |                                                                                                                                                                                      |                                                     |
| Summary of evidence         | 24 | Summarize the main findings including the strength of evidence for each main outcome; consider their relevance to key groups (e.g., healthcare providers, users, and policy makers). | 11-14                                               |
| Limitations                 | 25 | Discuss limitations at study and outcome level (e.g., risk of bias), and at review-level (e.g., incomplete retrieval of identified research, reporting bias).                        | 14                                                  |
| Conclusions                 | 26 | Provide a general interpretation of the results in the context of other evidence, and implications for future research.                                                              | 15                                                  |
| <b>FUNDING</b>              |    |                                                                                                                                                                                      |                                                     |
| Funding                     | 27 | Describe sources of funding for the systematic review and other support (e.g., supply of data); role of funders for the systematic review.                                           | 16                                                  |

From: Moher D, Liberati A, Tetzlaff J, Altman DG, The PRISMA Group (2009). Preferred Reporting Items for Systematic Reviews and Meta-Analyses: The PRISMA Statement. PLoS Med 6(6): e1000097. doi:10.1371/journal.pmed1000097



**SUPPLEMENTARY FIGURE 1: FREQUENCY CHART OF COMPONENTS OF WHEEZE DEFINITIONS**

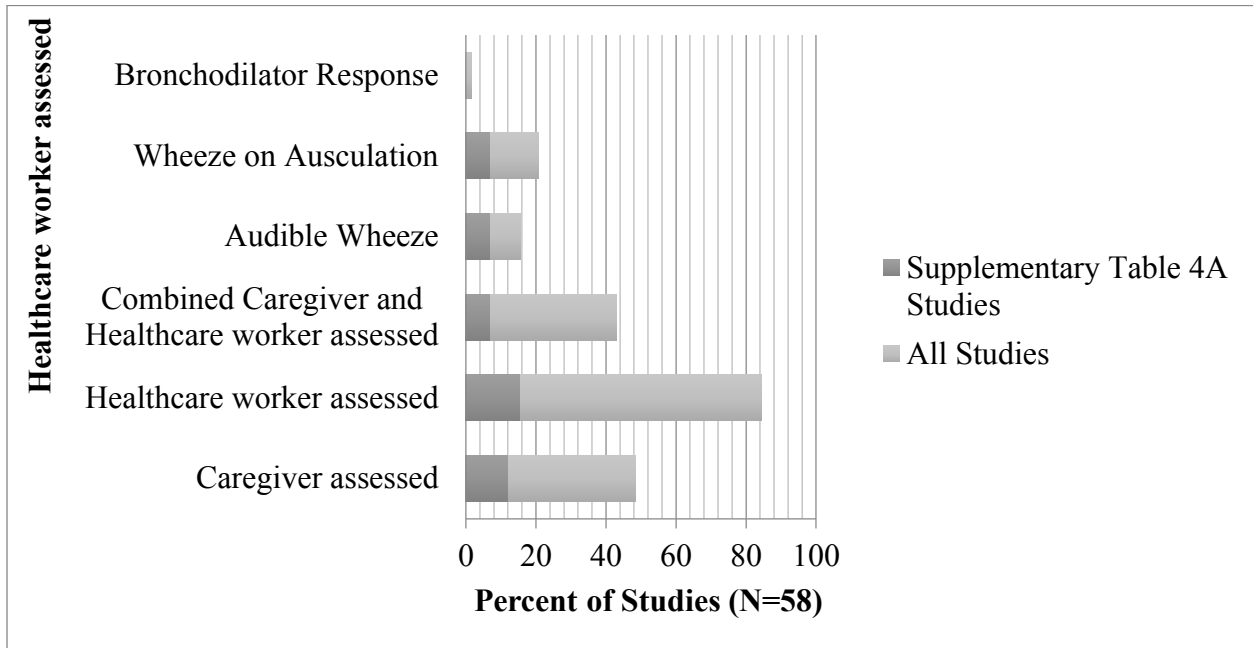

**SUPPLEMENTARY FIGURE 2: FREQUENCY CHART DEPICTING OPERATIONALIZATION ASPECTS OF WHEEZE DEFINITIONS IN PAEDIATRIC DRUG AND VACCINE TRIALS**

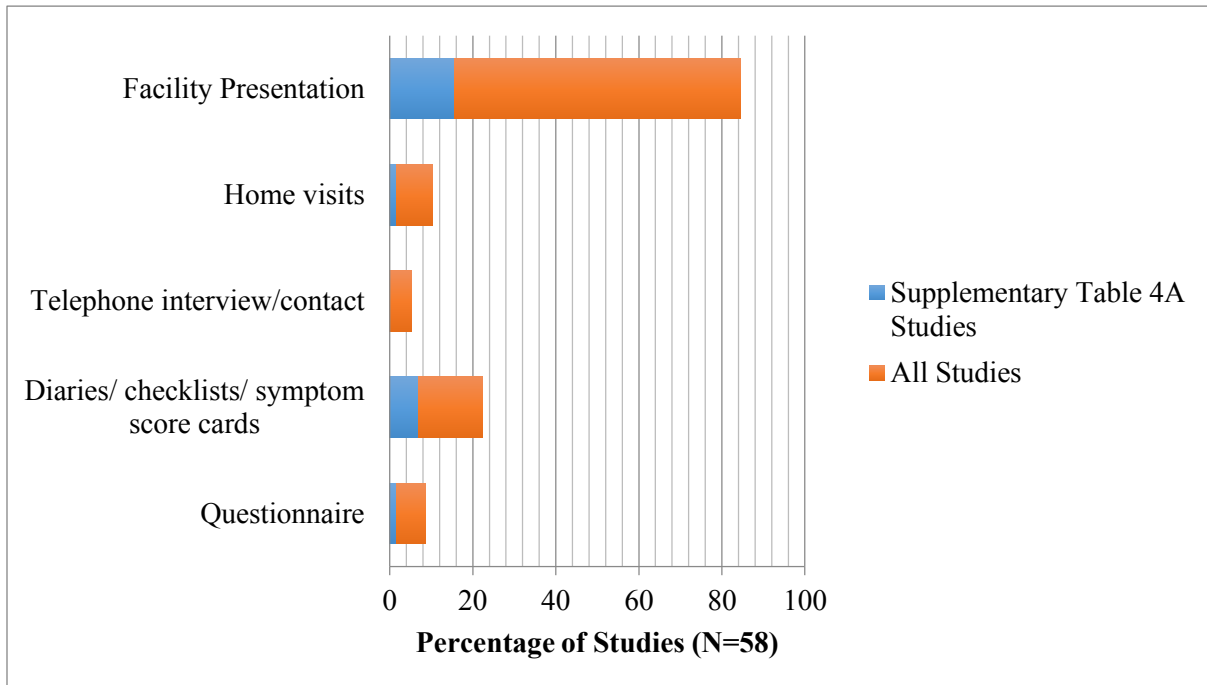

Supplement: NIHMS755033-supplement-supplement_1.pdf [file NIHMS755033-supplement-supplement_1.pdf]
